# Supplementary material for: Synergetic treatment of dye contaminated wastewater using microparticles functionalized with carbon nanotubes/titanium dioxide nanocomposites
Source: Royal Society of Chemistry journal article supplement (doi:10.1039/c9ra10899h), 2020-01-01
Supplement: c9ra10899h1.pdf [file c9ra10899h1.pdf]

## Electronic Supplementary Information

### Synergetic treatment of dye contaminated wastewater using microparticles functionalized with carbon nanotubes/ titanium dioxide nanocomposites

Zheng Lian, Chaohui Wei, Bin Gao, Xiaogang Yang, Yue Chan, Jing Wang, George Zheng Chen, Kai Seng Koh, Yong Shi, Yuying Yan, Yong Ren\*, Jun He\*, Fu Liu\*

\*Email: yong.ren@nottingham.edu.cn; jun.he@nottingham.edu.cn; fu.liu@nimte.ac.cn

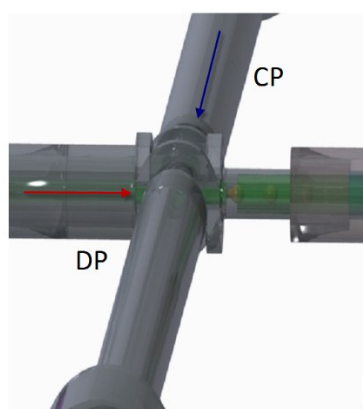

Fig. S1 3D Schematic of the PDMS-MWCNTs/TiO<sub>2</sub> microdroplet generation process.

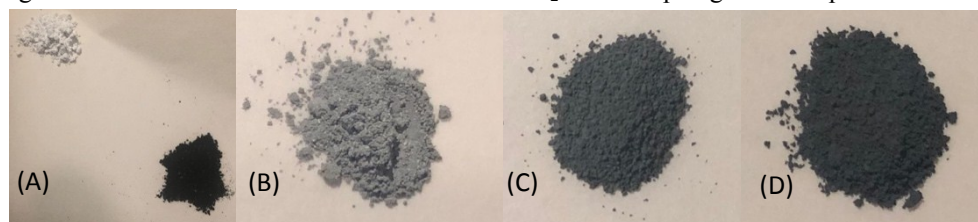

Fig. S2 Pristine TiO<sub>2</sub> is white color (Fig. S2A top left), and with the increasing of carbon contents from 5% to 20%, the colors of composites were gradually transferred from light grey to dark grey in Fig. S2B, C, D for 5%, 10% and 20%, respectively. The color of acid-treated MWCNTs is pure black as shown in Fig. S2A bottom right.

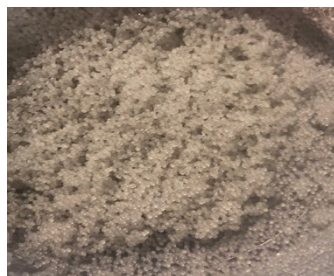

Fig. S3 Collection of PDMS-MWCNTs/TiO<sub>2</sub> microparticles.

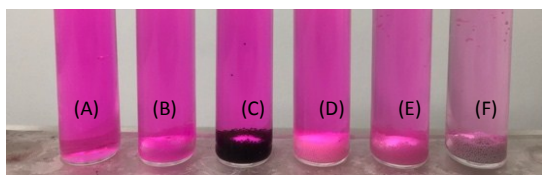

Fig. S4 Color change after photodegradation by different types of PDMS microparticles, from A to F: RhB solution; PDMS-P; PDMS-M; PDMS-T; PDMS-MWCNTs/TiO<sub>2</sub> (1 wt%) and PDMS-MWCNTs/TiO<sub>2</sub> (2 wt%), respectively.
